# Supplementary material
Source: HighWire-hosted journal article supplement (https://ez-admanager.com/highwire/filestream/136826/field_highwire_adjunct_files/0/rohrer_1329.pdf)
Supplement: rohrer_1329.pdf [file rohrer_1329.pdf]

# La proteína del neurofilamento de cadena liviana sérica es una medida de intensidad de enfermedad en la demencia frontotemporal

Jonathan D. Rohrer, PhD  
Ione O.C. Woollacott, MRCP  
Katrina M. Dick, BSc  
Emilie Brotherhood, BSc  
Elizabeth Gordon, MSc  
Alexander Fellows, BSc  
Jamie Toombs, MSc  
Ronald Druyeh, BSc  
M. Jorge Cardoso, PhD  
Sebastien Ourselin, PhD  
Jennifer M. Nicholas, PhD  
Niklas Norgren, PhD  
Simon Mead, PhD  
Ulf Andreasson, PhD  
Kaj Blennow, PhD  
Jonathan M. Schott, MD  
Nick C. Fox, MD  
Jason D. Warren, PhD  
Henrik Zetterberg, PhD

Correspondencia y solicitud de separatas al Dr Rohrer: j.rohrer@ucl.ac.uk

## RESUMEN

**Objetivo:** Investigar las concentraciones de la proteína del neurofilamento de cadena liviana (NfL) en suero en la demencia frontotemporal (DFT) y ver si están asociadas con la severidad de la enfermedad.

**Métodos:** Se recolectaron muestras séricas de 74 participantes (34 con variante conductual de DFT [DFTvc], 3 con DFT y enfermedad de motoneurona y 37 con afasia progresiva primaria [APP]) y 28 controles sanos. Veinticuatro de los participantes con DFT eran portadores de la mutación patogénica *C9orf72* (9), proteína tau asociada a microtúbulo (*MAPT*; 11) o progranulina (*GRN*; 4). Las concentraciones séricas de NfL fueron determinadas con el kit *NF-Light* transferido a una plataforma de matriz de molécula única y comparadas entre los pacientes con DFT y los controles sanos, y entre los subtipos clínicos y genéticos de DFT. También evaluamos la relación entre las concentraciones de NfL y las mediciones cognitivas y el volumen cerebral.

**Resultados:** Las concentraciones séricas de NfL fueron globalmente mayores en pacientes con DFT (media 77,9 pg/mL [DE 51,3 pg/mL]) que en controles (19,6 pg/mL [DE 8,2 pg/mL];  $p < 0,001$ ). Las concentraciones también fueron significativamente mayores en la DFTvc (57,8 pg/mL [DE 33,1 pg/mL]) y tanto en la variante semántica como en la no fluente de la APP (95,9 y 82,5 pg/mL [DE 33,0 y 33,8 pg/mL], respectivamente) en comparación con los controles, y en la variante semántica comparada con la variante logopéica de la APP. Las concentraciones fueron significativamente mayores que en los controles tanto en el subgrupo *C9orf72* como en el *MAPT* (79,2 y 40,5 pg/mL [DE 48,2 y 20,9 pg/mL], respectivamente), con una tendencia a un nivel mayor en el subgrupo *GRN* (138,5 pg/mL [DE 103,3 pg/mL]). Sin embargo, hubo variabilidad dentro de cada grupo. Las concentraciones séricas se correlacionaron particularmente con la tasa de atrofia del lóbulo frontal ( $r = 0,53$ ;  $p = 0,003$ ).

**Conclusiones:** En la DFT se ven concentraciones séricas elevadas de NfL, pero muestran una amplia variabilidad entre cada grupo clínico y genético. Mayores concentraciones pueden reflejar la intensidad de la enfermedad en la DFT y están asociadas a una atrofia más rápida de los lóbulos frontales. **Neurology**® 2016;87:1329–1336

## GLOSARIO

**APP** = afasia progresiva primaria; **APP-SOE** = afasia progresiva primaria sin otra especificación; **APPvnf** = variante no fluente de la afasia progresiva primaria; **APPvs** = variante semántica de la afasia progresiva primaria; **DFT** = demencia frontotemporal; **DFTvl** = variante logopéica de la demencia frontotemporal; **DFTvc** = variante conductual de la demencia frontotemporal; **EMN** = enfermedad de neurona motora; **GENFI** = *Genetic Frontotemporal Dementia Initiative* (Iniciativa genética de la demencia frontotemporal); **NfL** = neurofilamento de cadena liviana; **Simoa** = *Single molecule array* (matriz de molécula única).

La demencia frontotemporal (DFT) es una causa común de demencia de comienzo temprano.<sup>1</sup> Clínicamente, los pacientes se presentan con cambios en la personalidad (variante conductual de la DFT [DFTvc]) o con alteraciones del lenguaje (afasia progresiva primaria [APP]), aunque no es infrecuente la superposición con la enfermedad de motoneurona (DFT-EMN).<sup>1</sup> La DFT tiene una causa genética autosómica dominante en alrededor de un cuarto de los pacientes, siendo las mutaciones más comunes en los genes de la progranulina (*GRN*), en el marco de lectura abierta 72 del cromosoma 9 (*C9orf72*, *chromosome 9 open reading frame 72*), y

Del Dementia Research Centre (J.D.R., I.O.C.W., K.M.D., E.B., E.G., A.F., M.J.C., S.O., J.M.N., J.M.S., N.C.F., J.D.W.), MRC Prion Unit (S.M., R.D.), Department of Neurodegenerative Disease, and Department of Molecular Neuroscience (J.T., H.Z.), UCL Institute of Neurology, Queen Square; Centre for Medical Image Computing (J.M.C., S.O.), University College London; Department of Medical Statistics (J.M.N.), London School of Hygiene and Tropical Medicine, UK; Uman Diagnostics (N.N.), Umeå; and Clinical Neurochemistry Laboratory (U.A., K.B., H.Z.), Department of Psychiatry and Neurochemistry, Institute of Neuroscience and Physiology, Sahlgrenska Academy at the University of Gothenburg, Mölndal, Sweden.

Ir a [Neurology.org](http://Neurology.org) para declaraciones de intereses completas. La información sobre fondos y aquellas declaraciones relevantes para los autores, si existiesen, se encuentran al final del artículo.

Los cargos del procesamiento del artículo fueron pagados por Medical Research Council.

Este es un artículo de acceso libre distribuido bajo los términos de la Creative Commons Attribution License 4.0 (CC BY), que permite el uso sin restricciones, su distribución y reproducción en cualquier medio, siempre y cuando el trabajo original este correctamente citado.

en la proteína tau asociada a microtúbulo (*MAPT*, *microtubule-associated protein tau*).<sup>2</sup>

Pocos biomarcadores fluidos han sido investigados en la DFT, aunque ha habido hasta ahora un número de estudios de las concentraciones de neurofilamento en el LCR.<sup>3-11</sup> Se cree que niveles mayores de neurofilamento de cadena liviana (NfL) representarían el grado de degeneración axonal,<sup>12,13</sup> y mientras que los estudios tempranos muestran variabilidad en las concentraciones en LCR en la DFT,<sup>4-10</sup> un estudio más reciente ha sugerido que los niveles de NfL en LCR se correlacionan con la severidad de la enfermedad.<sup>11</sup>

Hay un considerable interés en desarrollar biomarcadores en sangre debido a su conveniencia y mayor aceptabilidad en relación con el LCR. El NfL puede ser medido en suero con formatos de inmunoensayo estándar,<sup>14</sup> pero aquellos basados en métodos de ELISA o electroquimioluminiscencia no tienen la sensibilidad analítica para medir niveles bajos. Por esta razón, desarrollamos un inmunoensayo basado en la técnica de matriz de molécula única (*Simoa*, *single-molecule array*)<sup>15</sup> que permite la cuantificación por debajo de las concentraciones subfemtomolares (< 1 pg/mL) de la sustancia analizada, y es 25 veces más sensible que el método previo basado en electroquimioluminiscencia.<sup>16</sup> Utilizando este ensayo, buscamos investigar las concentraciones séricas de NfL en la DFT. Nuestras hipótesis fueron que la concentración sérica de NfL estaría elevada en pacientes con DFT en comparación con controles sanos, que las concentraciones variarían entre los subgrupos de DFT y que los niveles séricos elevados de NfL reflejarían la intensidad de la enfermedad o la tasa de progresión.

**MÉTODOS** Se reclutaron 74 participantes de forma consecutiva del *University College London FTD study*: 34 participantes con DFTvc de acuerdo con los criterios de Rascovsky,<sup>17</sup> 3 participantes con DFT-EMN<sup>18</sup> y 37 participantes con APP de acuerdo con los criterios Gorno-Tempini.<sup>19</sup> De los 37 participantes con APP, 13 tenían la variante no fuente (APPvnf), 10 tenían la variante semántica (APPvs), 7 tenían la variante logopénica (APPvl) y 7 no cumplían criterios para ninguna de las 3 variantes (APP-SOE, sin otra especificación). No incluimos pacientes que cumplieran criterios de APPvl en el análisis de DFT global porque frecuentemente tienen una enfermedad de Alzheimer subyacente desde el punto de vista patológico.<sup>1,2</sup> Los datos fueron comparados con datos de 28 controles sanos pareados según sexo y edad, que habían sido recolectados como parte de un estudio de enfermedad neurodegenerativa (tabla 1). Veinticuatro de los participantes con DFT eran portadores de una mutación patogénica: 9 con una expansión en el *C9orf72* (8 con DFTvc, 1 con APPvnf), 11 con una mutación en *MAPT* (todos con DFTvc) y 4 con una mutación en *GRN* (1 con DFTvc, 1 con APPvnf y 2 con APP-SOE). No se encontraron mutaciones en los otros participantes. No hubo diferencias significativas en edad y sexo entre los grupos, y no hubo diferencias significativas en la duración de la enfermedad entre los subgrupos clínicos y genéticos de DFT.

**Aprobaciones estándar del protocolo, registros y consentimiento de pacientes.**

Se obtuvo la aprobación para este estudio del comité de ética local, y todos los participantes dieron su consentimiento informado por escrito para tomar parte del estudio.

**Medición de las concentraciones séricas de NfL.**

Las muestras de suero fueron recolectadas de cada uno de los participantes y luego procesadas, divididas en alícuotas, y congeladas a -80 °C de acuerdo con los procedimientos estandarizados. Las concentraciones séricas de NfL fueron medidas con el ensayo *NF-Light* de UmanDiagnostics (Umeå, Suecia) y transferidas a la plataforma *Simoa* con un kit propio (Quanterix Corp, Boston,

**Tabla 1** Características demográficas de los participantes del estudio

| Grupo de enfermedad                      | Controles  | DFT total   | DFTvc       | DFT-EMN      | APPvnf      | APPvs       | APPvl       | APP-SOE     |
|------------------------------------------|------------|-------------|-------------|--------------|-------------|-------------|-------------|-------------|
| No.                                      | 28         | 67          | 34          | 3            | 13          | 10          | 7           | 7           |
| Edad, media (DE), años                   | 63.9 (7.2) | 64.5 (7.9)  | 63.0 (8.3)  | 65.0 (0.3)   | 67.5 (9.7)  | 65.2 (6.4)  | 65.6 (5.9)  | 63.9 (5.2)  |
| Sexo masculino, %                        | 46,4       | 61,2        | 73,5        | 66,7         | 23,1        | 60,0        | 71,4        | 71,4        |
| Duración de enfermedad, media (DE), años | NA         | 5.5 (3.7)   | 6.2 (4.6)   | 6.0 (4.6)    | 3.8 (1.5)   | 6.0 (2.1)   | 6.4 (2.9)   | 4.5 (2.5)   |
| NfL sérica, media (DE), pg/mL            | 19,6 (8,2) | 77,9 (51,3) | 57,8 (33,1) | 195,0 (69,9) | 82,5 (33,8) | 95,9 (33,0) | 49,5 (19,4) | 91,2 (86,6) |

Abreviaturas: APP-SOE = afasia progresiva primaria sin otra especificación; APPvnf = variante no fuente de la afasia progresiva primaria; APPvs = variante semántica de la afasia progresiva primaria; DFT = demencia frontotemporal; DFTvl = variante logopénica de la demencia frontotemporal; DFTvc = variante conductural de la demencia frontotemporal; DFT-EMN = demencia frontotemporal con enfermedad de motoneurona; NA = no aplicable; NfL = neurofilamento de cadena liviana. La DFT total no incluye la APPvl.

MA). Las instrucciones detalladas pueden encontrarse en la *Simoa Homebrew Assay Development Guide* (Quanterix). En resumen, se activaron tiras carboxiladas paramagnéticas (catálogo no. 100451, Quanterix) agregando 5% (vol/vol) 1-etil-3-(3-dimetilaminopropil) carbodiimida 10 mg/mL (no. catálogo 100022, Quanterix) a una solución de tiras magnéticas con  $1,4 \times 10^6$  tiras/ $\mu$ L. Luego de una incubación de 30 minutos a temperatura ambiente, las tiras fueron lavadas con un separador magnético y un volumen inicial, por ej., 1-etil-3-(3-dimetilaminopropil) carbodiimida + volumen de la solución de tiras del paso anterior, se agregaron 0,3 mg/mL de solución helada del anticuerpo capturado (UD1, UmanDiagnos-

tics). Luego de 2 horas de incubación en un mixer (2000 rpm, Multi-Tube Vortexer, Allsheng, China) a temperatura ambiente, las tiras fueron lavadas, y se agregó un volumen de reacción inicial de solución bloqueadora. Luego de 3 lavados, las tiras conjugadas fueron suspendidas y guardadas a 4 °C pendientes de análisis. Antes del análisis, las tiras fueron diluidas a 2500 tiras/ $\mu$ L en un diluyente. El anticuerpo detector (1 mg/mL, UD2, UmanDiagnostics) fue biotinilado agregando 3% (vol/vol) 3,4 mmol/L EZ-Link NHS-PEG4-Biotin (Quanterix), seguido por una incubación de 30 minutos a temperatura ambiente. Se removió la biotina libre por filtración por centrifugación (Amicon Ultra-2, 50 kDa, Sigma, St. Louis, MO), y el anticuerpo biotinilado fue guardado a 4 °C pendiente de análisis. Las muestras de suero fueron analizadas en duplicado en un instrumento Simoa HD-1 (Quanterix) utilizando un protocolo de ensayo por dilución en 2 pasos que comienza con una aspiración del diluyente de 100  $\mu$ L de tiras conjugadas (2500 tiras/ $\mu$ L), seguido por la adición de 20  $\mu$ L de anticuerpo biotinilado (0,1  $\mu$ g/mL) y 100  $\mu$ L de muestra diluida por 4 (o calibrador no diluido) al pellet de tiras. Tanto para las muestras como para el calibrador, se utilizó el mismo diluyente (solución salina buffer-fosfato; 0,1% Tween-20; 2% albúmina sérica bovina; 10  $\mu$ g/mL TRU Block [Meridian Life Science, Inc, Memphis, TN]). Luego de una incubación de cadencia 47 (1 cadencia = 45 segundos), las tiras fueron lavadas, seguido por la adición de 100  $\mu$ L de  $\beta$ -galactosidasa conjugada con streptavidina (150 pmol/L, no. catálogo 100439, Quanterix). Esto fue seguido por una incubación de cadencia 7 y un lavado. Antes de la lectura, se agregaron 25  $\mu$ L de resorufina  $\beta$ -D-galactopiranosida (No. catálogo 100017, Quanterix). La curva del calibrador fue construida utilizando el estándar del ELISA NfL (NF-Light, UmanDiagnostics) en triplicado. Los límites inferiores de detección y cuantificación, definidos como la concentración derivada de la señal de las muestras blanco (diluyente de la muestra) + 3 y 10 DE, fueron 0,97 y 2,93 pg/mL, respectivamente. Para evaluar la linealidad del ensayo, 6 diferentes muestras fueron analizadas a diluciones por 4- (*default*), 8-, y 16-, y el promedio del coeficiente de variación para la concentración medida a las diferentes diluciones fue 11,5%. Todas las muestras fueron medidas como duplicados. El coeficiente de variación medio de las concentraciones duplicadas fue de 4,3%. Además, una muestra de control de calidad fue medida en duplicado en cada una de las 7 corridas utilizadas para completar el estudio. El coeficiente de variación intra-ensayo para esta muestra fue < 10%. Todas las mediciones fueron realizadas por técnicos de laboratorio certificados en una ronda de experimentos utilizando un lote de reactivos.

**Figura 1** Concentraciones séricas del neurofilamento de cadena liviana en los participantes por (A) diagnóstico clínico y (B) estado genético

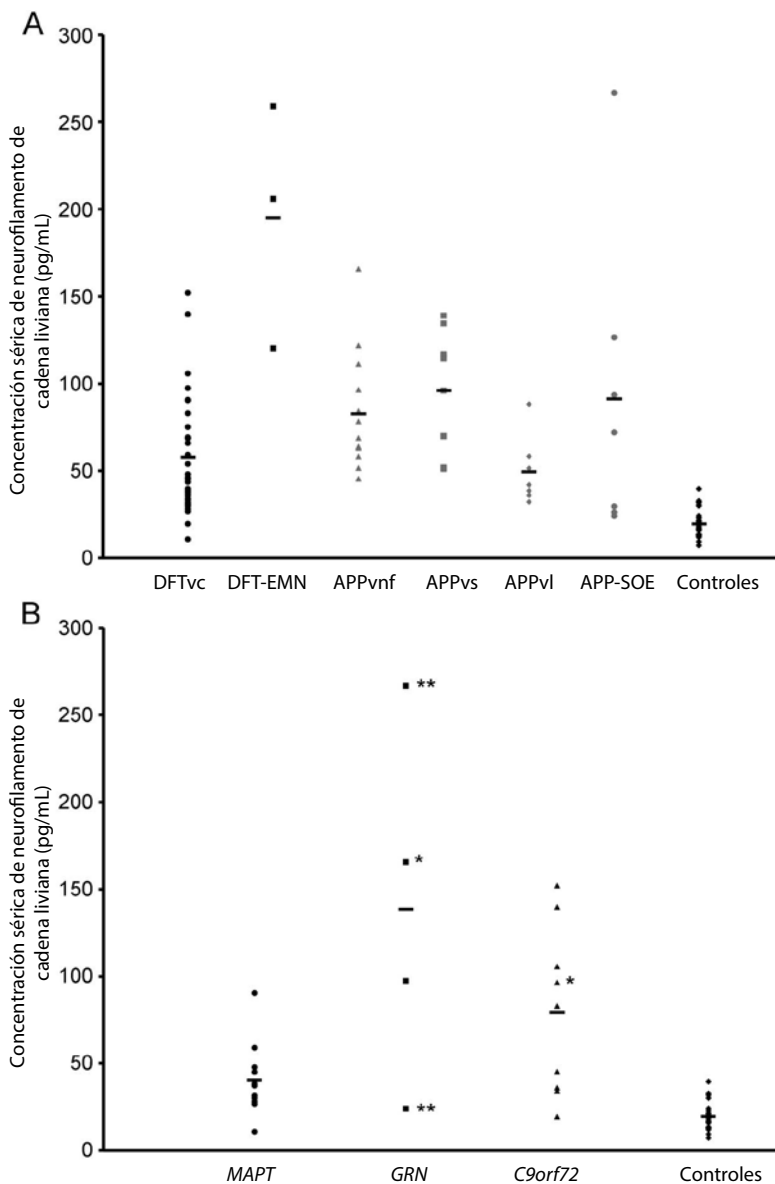

Todos los pacientes con DFT genética tuvieron la variante conductual de demencia frontotemporal (DFTvc), excepto aquellos \*con variante no fluente de afasia progresiva primaria (APPvnf) y \*\*con afasia progresiva primaria sin otra especificación (APP-SOE). DFT-EMN = demencia frontotemporal con enfermedad de motoneurona; APPvl = variante logopéptica de la afasia progresiva primaria; APPvs = variante semántica de la afasia progresiva primaria.

**Tabla 2** Comparación de las concentraciones séricas de neurofilamento de cadena liviana entre los subgrupos de enfermedad y el grupo control

|                  | DFTvc       | DFT-EMN       | APPvnf       | APPvs        | APPvl        | APP-SOE      |
|------------------|-------------|---------------|--------------|--------------|--------------|--------------|
| <b>Controles</b> | -38,2 (5,9) | -175,3 (40,4) | -62,9 (9,5)  | -76,2 (10,5) | -29,9 (7,5)  | -71,6 (32,8) |
| <b>p</b>         | < 0,001     | 0,185         | < 0,001      | 0,001        | 0,053        | 0,413        |
| <b>DFTvc</b>     |             | -137,2 (40,8) | -24,7 (10,9) | -38,1 (11,9) | 8,3 (9,3)    | -71,6 (32,8) |
| <b>p</b>         |             | 0,276         | 0,308        | 0,070        | 0,968        | 0,413        |
| <b>DFT-EMN</b>   |             |               | 112,4 (41,5) | 99,1 (41,7)  | 145,4 (41,0) | 103,8 (51,9) |
| <b>p</b>         |             |               | 0,374        | 0,451        | 0,248        | 0,509        |
| <b>APPvnf</b>    |             |               |              | -13,3 (14,0) | 33,0 (11,9)  | -8,7 (34,0)  |
| <b>p</b>         |             |               |              | 0,959        | 0,136        | 1,000        |
| <b>APPvs</b>     |             |               |              |              | 46,3 (12,7)  | 4,7 (34,4)   |
| <b>p</b>         |             |               |              |              | 0,032        | 1,000        |
| <b>APPvl</b>     |             |               |              |              |              | -41,7 (33,5) |
| <b>p</b>         |             |               |              |              |              | 0,857        |

Abreviaturas: APP-SOE = afasia progresiva primaria sin otra especificación; APPvnf = variante no fluente de la afasia progresiva primaria; APPvs = variante semántica de la afasia progresiva primaria; DFT = demencia frontotemporal; DFTvl = variante logopénica de la demencia frontotemporal; DFTvc = variante conductual de la demencia frontotemporal; DFT-EMN = demencia frontotemporal con enfermedad de motoneurona.

Los valores están dados como diferencia media de la concentración sérica de neurofilamento entre los grupos (SEM) y se refiere a la comparación de filas vs columnas.

**Evaluación psicométrica.** Cuarenta y siete participantes tuvieron una evaluación psicométrica basal, generalmente el mismo día de las muestras séricas, pero a un máximo de 6 meses desde el momento de la recolección de muestras (intervalo medio 0.0 años [DE 0.2 años]): 22 con DFTvc, 2 con DFT-EMN y 23 con APP (9 con APPvnf, 9 con APPvs y 5 con APP-SOE). Veintinueve participantes tuvieron pruebas psicométricas de seguimiento con un intervalo de 1.1 años (DE 0.2 años): 11 con DFTvc, 2 con DFT-EMN y 16 con APP (5 con APPvnf, 7 con APPvs y 4 con APP-SOE). Las pruebas incluyeron la *Wechsler Abbreviated Scale of Intelligence Vocabulary, Block Design, Similarities and Matrices subtests* (Escala Abreviada Wechsler de Vocabulario Inteligente, Diseño de Block, Similitudes y subpruebas de Matrices)<sup>20</sup>; las *Recognition Memory Tests for Faces and Words* (Pruebas de Reconocimiento de Memoria para Caras y Palabras)<sup>21</sup>; la *Graded Naming Test* (Prueba de Nominación Graduada)<sup>22</sup>; la *Graded Difficulty Calculation Test* (Prueba de Cálculo de Dificultad Graduada)<sup>23</sup>; y la *Delis-Kaplan Executive Function System Color-World Interference Test* (Prueba de Función Ejecutiva Delis-Kaplan de Interferencia de Color-Palabra),<sup>24</sup> como también el *Mini-Mental State Examination* (Examen de Estado Mental Mínimo).<sup>25</sup>

**Análisis de neuroimágenes.** A 46 de los participantes con DFT se les realizó una RM T1 de encéfalo en un equipo Siemens Trio 3T, generalmente el mismo día en el que se tomó la muestra sérica, pero a un máximo de 6 meses desde el momento de la recolección de la muestra (intervalo medio 0.0 años [DE 0.2 años]): 24 con DFTvc, 2 con DFT-EMN y 20 con APP (8 con APPvnf, 8 con APPvs y 4 con APP-SOE). Veintinueve participantes tuvieron una imagen de

seguimiento a los 1.1 años (DE 0.4 años) luego de la imagen basal: 13 con DFTvc, 2 con DFT-EMN y 14 con APP (5 con APPvnf, 6 con APPvs y 3 con APP-SOE). Los volúmenes cerebrales totales fueron medidos con un método de segmentación semi-automático<sup>26</sup>, calculando las tasas anualizadas de atrofia cerebral total con un integral de límite desplazado.<sup>27</sup> Los volúmenes lobares corticales individuales fueron medidos con un enfoque de segmentación propagación multiatlas, siguiendo el protocolo *brainCOLOR* ([www.braincolor.org](http://www.braincolor.org)), combinando regiones de interés para calcular los volúmenes de sustancia gris para cada lóbulo.<sup>28,29</sup> Las tasas anualizadas de atrofia lobar fueron calculadas utilizando las diferencias de los volúmenes entre las imágenes basales y de seguimiento, y dividiéndolo por el intervalo entre las imágenes.

**Análisis estadístico.** Las concentraciones séricas de NfL fueron inicialmente comparadas entre el grupo control y el grupo de DFT total. El test de Levene para homogeneidad demostró varianzas no iguales entre estos 2 grupos (estadística Levene = 22,8;  $p < 0,001$ ); por lo tanto, el test *t* de Welch (sin asumir igual varianza) fue utilizado para comparar los grupos. Los datos de NfL

**Tabla 3** Comparación de las concentraciones séricas de neurofilamento de cadena liviana entre los subgrupos genéticos y el grupo control

|                | MAPT        | GRN           | C9orf72      |
|----------------|-------------|---------------|--------------|
| <b>Control</b> | -20,8 (6,5) | -118,8 (51,7) | -59,5 (16,2) |
| <b>p</b>       | 0,035       | 0,277         | 0,025        |
| <b>MAPT</b>    |             | -98,0 (52,0)  | -38,7 (17,3) |
| <b>p</b>       |             | 0,386         | 0,175        |
| <b>GRN</b>     |             |               | 59,3 (54,1)  |
| <b>p</b>       |             |               | 0,712        |

Los valores están dados como diferencia media de la concentración sérica del neurofilamento entre los grupos (SEM) y se refiere a la comparación de filas vs columnas

**Tabla 4** Características cognitivas y de imagen de los participantes del estudio de demencia frontotemporal

|                                              | Basal, media (DE) | Longitudinal, media (DE) |
|----------------------------------------------|-------------------|--------------------------|
| <b>Mediciones cognitivas</b>                 |                   |                          |
| Participantes, n                             | 47                | 29                       |
| MMSE                                         | 23,8 (5,7)        | -1,7 (5,0)               |
| WASI vocabulario                             | 4,4 (4,4)         | -0,9 (2,9)               |
| WASI diseño en bloque                        | 8,7 (4,3)         | -0,4 (2,6)               |
| WASI similitudes                             | 5,9 (4,3)         | -1,5 (3,1)               |
| WASI matrices                                | 9,4 (4,3)         | 0,1 (2,6)                |
| RMT caras                                    | 5,2 (4,1)         | -0,9 (3,7)               |
| RMT palabras                                 | 6,1 (4,5)         | -1,5 (4,1)               |
| Prueba graduada de nominación                | 4,2 (4,4)         | -1,7 (3,0)               |
| Prueba de cálculo difícil graduada           | 7,8 (5,0)         | -0,9 (2,4)               |
| Prueba de interferencia color-palabra D-KEFS | 6,1 (5,1)         | -1,7 (2,5)               |
| <b>Mediciones de imagen</b>                  |                   |                          |
| Participantes, n                             | 46                | 29                       |
| Cerebro completo                             | 72,6 (5,0)        | 1,9 (1,5)                |
| Frontal                                      | 10,4 (1,0)        | 2,2 (2,7)                |
| Temporal                                     | 7,0 (0,9)         | 2,7 (2,4)                |
| Parietal                                     | 6,0 (0,5)         | 1,2 (2,9)                |
| Occipital                                    | 4,9 (0,4)         | 0,7 (2,5)                |
| Ínsula                                       | 0,8 (0,1)         | 2,6 (2,6)                |
| Cíngulo                                      | 1,6 (0,1)         | 1,2 (2,0)                |

Abreviaturas: D-KEFS = Sistema de Función Ejecutiva Delis-Kaplan; MMSE = Examen de Estado Mental Mínimo; RMT = Prueba de Reconocimiento de Memoria; WASI = Escala de Inteligencia Abreviada Wechsler.

Las mediciones cognitivas basales con puntajes estándar, excepto el MMSE (sobre 30). Los puntajes cognitivos longitudinales son el cambio anualizado en el puntaje estándar (o cambio en el puntaje de MMSE); un puntaje negativo es un descenso del puntaje. Los volúmenes cerebrales basales están expresados como un porcentaje del volumen intracraneal total (medido en Mapeo de Parámetros Estadísticos [SPM12]). Las mediciones de imagen longitudinales son tasas de atrofia anualizadas (%).

sérica tuvieron una distribución normal (test Kolmogorov-Smirnov), por lo cual se utilizó un análisis de varianza para comparar las concentraciones séricas medias de NfL a través de cada uno de los subgrupos clínicos (DFTvc, DFT-EMN, APPvnf, APPvs, APPvl y APP-SOE) y a través de los subgrupos genéticos de DFT (*MAPT*, *GRN* y *C9orf72*), y para comparar cada uno de estos subgrupos con el grupo control. Para permitir una varianza desigual, se utilizó la corrección de Games-Howell para comparaciones *post hoc* de a pares entre grupos. Los mismos métodos estadísticos fueron también utilizados para comparar niveles de NfL entre los subgrupos genéticos y entre cada uno de estos grupos y el grupo control. El coeficiente de correlación de Pearson fue utilizado para examinar la asociación entre las concentraciones séricas de NfL y cada una de las mediciones cognitivas y de imagen (con la corrección de Bonferroni para las comparaciones múltiples evaluadas, por ej.,  $p < 0,005$  para las mediciones cognitivas y  $p < 0,007$  para las mediciones de imagen).

**RESULTADOS** Las concentraciones séricas de NfL en los grupos control y el total de las DFT y en cada grupo subclínico se muestran en la tabla 1.

El valor más bajo de concentración sérica de NfL en el estudio (7,2 pg/mL) fue bastante mayor a los límites inferiores de detección y cuantificación del ensayo. Las concentraciones séricas de NfL fueron significativamente mayores en el grupo de DFT total vs controles (media 77,9 pg/mL [DE 51,3 pg/mL] y 19,6 pg/mL [DE 8,2 pg/mL] respectivamente; diferencia media = 58,3 pg/mL, intervalo de confianza del 95% 45,4-71,1;  $p < 0,001$ ). Para distinguir las DFT de los controles, un punto de corte de 33 pg/mL dio una sensibilidad del 84% y una especificidad del 96%. Las concentraciones séricas de NfL también fueron significativamente mayores en la mayoría de los subgrupos clínicos de DFT en comparación con el grupo control (estadística Welch = 25,1; *df* 5, 13,2;  $p < 0,001$ ) (figura 1A, tabla 2). Comparadas con los controles, las concentraciones séricas de NfL fueron mayores en pacientes con DFTvc, APPvnf y APPvs. Aunque los pacientes con DFT-EMN tuvieron concentraciones séricas medias de NfL mayores que los controles (y todos los otros grupos), esta diferencia no alcanzó a ser estadísticamente significativa, posiblemente por el tamaño de la muestra del grupo DFT-EMN. Las concentraciones séricas de NfL no fueron significativamente diferentes entre cualquiera de los subgrupos clínicos de DFT, aunque hubo una tendencia (no significativa) hacia un mayor nivel en los pacientes con APPvs en comparación con los pacientes con DFTvc (diferencia media = 38,1;  $p = 0,070$ ). Hubo un nivel significativamente mayor en los pacientes con APPvs en comparación con los APPvl (diferencia media = 46,3;  $p = 0,032$ ).

Las concentraciones medias de NfL fueron mayores en cada uno de los subgrupos genéticos que en los controles (figura 1B, tabla 3): 138,5 pg/mL (DE 103,3 pg/mL) en mutaciones de *GRN*, 79,2 pg/mL (DE 48,2 pg/mL) en mutaciones de *C9orf72* y 40,5 pg/mL (DE 20,9 pg/mL) en mutaciones de *MAPT*. Sin embargo, solo el subgrupo *MAPT* (diferencia media de los controles = 20,8; intervalo de confianza del 95% = 1,4-40,3;  $p = 0,035$ ) y el subgrupo *C9orf72* (diferencia media de los controles = 59,5; intervalo de confianza del 95% = 8,0-111,0;  $p = 0,025$ ) fueron significativamente diferentes, con la falta de diferencia en el subgrupo *GRN* posiblemente debida al pequeño tamaño de la muestra (tabla 3). A pesar de los niveles medios de NfL aparentemente mayores en las mutaciones *GRN* y *C9orf72* en comparación con las *MAPT*, no hubo una diferencia significativa en los niveles entre los subgrupos genéticos (tabla 3).

Las mediciones basales y longitudinales cognitivas y de imagen se muestran en la tabla 4. Las concentraciones séricas de NfL se correlacionan con las mediciones basales de disfunción ejecutiva (similitudes de la *Wechsler Abbreviated Scale*

of Intelligence –Escala de Inteligencia Abreviada Wechsler– [ $r = -0,32$ ;  $p = 0,03$ ] y *Delis-Kaplan Executive Function System Color-Word Interference ink color naming task* –Sistema de Función Ejecutiva Delis-Kaplan Interferencia Color-Palabra tarea de nombramiento color– [ $r = -0,35$ ;  $p = 0,03$ ]), pero no con otras pruebas psicométricas basales o cambios longitudinales en las mediciones psicométricas. Sin embargo, ninguna medición cognitiva sobrevivió a la corrección para múltiples comparaciones. Tampoco hubo correlaciones significativas con los volúmenes cerebrales basales. Sin embargo, los niveles séricos de NfL estuvieron correlacionados con las tasas de atrofia del cerebro completo ( $r = 0,46$ ;  $p = 0,01$ ), el lóbulo frontal ( $r = 0,53$ ;  $p = 0,003$ ; figura 2) y el lóbulo parietal ( $r = 0,38$ ;  $p = 0,04$ ), aunque no con otras tasas de atrofia lobar. Solo la correlación con la tasa de atrofia del lóbulo frontal sobrevivió a la corrección para múltiples comparaciones.

**DISCUSIÓN** Utilizando un inmunoensayo ultrasensible, mostramos que las concentraciones séricas de NfL están aumentadas en la DFT y que mayores concentraciones están asociadas con tasas más rápidas de atrofia cerebral. Estos hallazgos sugieren que las concentraciones séricas de NfL reflejan la intensidad de la enfermedad en la DFT y que mayores concentraciones están asociadas con una progresión más rápida de enfermedad. Dentro de los subtipos de DFT, hubo una tendencia de mayores niveles en grupos con probable patología TDP-43 (clínicamente APPvs y DFT-EMN, genéticamente mutaciones en *GRN* y *C9orf72*) que en aquellos asociados a patología tau (mutaciones en *MAPT*), aunque hay una sustancial variabilidad en todos los grupos. Con un límite inferior de cuantificación de 0,26 pg/mL, todas las muestras, incluidas aquellas de los controles normales, pudieron ser cuantificadas de forma confiable, lo cual es una ventaja frente a estudios previos de NfL sérica en otras condiciones.<sup>14,30-32</sup>

Los resultados de este estudio son consistentes con aquellos encontrados en estudios previos de concentraciones de NfL en LCR en DFT: los niveles son consistentemente mayores en pacientes con DFT<sup>4-11</sup> y tienden a ser mayores en aquellos con probable patología TDP-43.<sup>10,11</sup> Ciertamente para la DFT genética, para la cual las mutaciones en *GRN* y *C9orf72* están asociadas con patología TDP-43, esto es consistente con una progresión más rápida (y menor duración de enfermedad) vista en muchos pacientes dentro de estos 2 grupos de mutaciones (independientemente del síndrome clínico) en comparación con la relativamente más lenta progresión de pacientes con mutaciones en *MAPT* (que está asociada con patología tau).<sup>33</sup> Un estudio previo también sugirió una correlación del NfL en LCR con las medicio-

nes de severidad de la enfermedad y, consistente con nuestro estudio, mostró una asociación de los niveles con la atrofia lobar frontal.<sup>11</sup>

Encontramos que los niveles séricos de NfL estuvieron correlacionados con la tasa de atrofia cerebral subsecuente, pero no con los volúmenes cerebrales basales. Las mediciones de atrofia cerebral son posiblemente mejores medidas de intensidad de enfermedad que una única medición de los volúmenes de cerebro completo o lobares, que reflejan la duración de la enfermedad y la variación normal, como también la actividad de la enfermedad. Los niveles séricos de NfL se correlacionaron con las mediciones basales de función ejecutiva, pero no con las mediciones longitudinales. Un número de pacientes tuvo puntajes cercanos al mínimo en las tareas ejecutivas basales; por lo tanto, hay menor habilidad de medir la progresión cuando dichas mediciones son evaluadas longitudinalmente.

Será importante investigar pacientes en diferentes estadios de la enfermedad porque esto puede influir en la asociación entre el NfL y las tasas de atrofia. El estudio de la Iniciativa de Demencia Frontotemporal Genética (GENFI, *Genetic Frontotemporal Dementia Initiative*)([www.genfi.org.uk](http://www.genfi.org.uk)) mostró recientemente que las tasas patológicas de atrofia cerebral parecen empezar hasta 10 años antes del inicio de los síntomas, pero que son variables entre las diferentes mutaciones genéticas.<sup>29</sup> Si las concentraciones séricas de NfL representan mediciones de intensidad de enfermedad, entonces haríamos la predicción de que los niveles deberían empezar a aumentar alrededor de 10 años antes del inicio y pueden aportar un marcador no invasivo útil de la proximidad del inicio de los síntomas.

Hay un número de limitaciones en este estudio. En particular, la mayoría de los pacientes no tuvieron confirmación patológica de su enfermedad, y futuros estudios deberían investigar los niveles séricos de NfL en diferentes anatomías patológicas de DFT. Aunque hay un número relativamente grande de casos para un estudio de una enfermedad tan rara como la DFT, los números individuales de cada subgrupo son pequeños (particularmente del grupo DFT-EMN), y sería útil para futuros estudios investigar grupos mayores de los subtipos individuales clínicos y genéticos. Las mediciones clínicas de estadificación de enfermedad en DFT han sido diseñadas recientemente (como el Puntaje de Degeneración Frontotemporal Lobar-Demencia Clínica<sup>34</sup> y la Escala de Puntaje de Demencia Frontotemporal<sup>35</sup>) y no estaban disponibles para esta cohorte; será importante para estudios futuros comparar esas mediciones con los niveles séricos de NfL.

Mayores concentraciones séricas de NfL están asociadas con una atrofia cerebral más rápida y pueden, por lo tanto, reflejar la intensidad de

la enfermedad en la DFT. Debido a que obtener muestras de sangre es menos invasivo y mejor aceptado que la punción lumbar, el NfL sérico puede aportar información pronóstica importante y ser una medida de resultado útil para ensayos clínicos en DFT. Sin embargo, se requie-

rirán más estudios para entender los factores que afectan la variabilidad de las concentraciones de NfL y para determinar si puede ser una medida útil en pacientes individuales.

### Comentario:

#### “Si lo puedes medir, lo puedes probar” (Lord Kelvin)

En la práctica clínica, la discapacidad y su progresión son notablemente difíciles de cuantificar, aumentando la necesidad de biomarcadores solubles confiables de daño neuroaxonal. El neurofilamento de cadena liviana (NfL) es una proteína andamio del citoesqueleto neural, con importantes roles en la ramificación y crecimiento axonal y dendrítico. Luego del daño neuronal, los niveles de NfL en el LCR aumentan y, por lo tanto, son considerados un biomarcador de daño axonal en tiempo real, altamente específico.

En el caso del NfL sérico, una tecnología de matriz de molécula única mejora sustancialmente la sensibilidad analítica a un punto en el cual las mediciones en sangre pueden ser usadas como puntos finales sustitutos en ensayos de neuroprotección o incluso en la práctica diaria en un futuro relativamente cercano.<sup>1,2</sup> El ensayo ultrasensible utilizado por Rohrer y colegas<sup>1</sup> permitió mediciones de NfL confiables en todas las muestras séricas, incluyendo los controles sanos, un paso gigante para un biomarcador que es independiente del LCR y, por lo tanto, aplicable en un contexto clínico de rutina. Más aún, los autores encontraron que su ensayo es cuantitativo: concentraciones mayores estuvieron asociadas con un curso más rápido de atrofia del lóbulo frontal ( $r = 0,53$ ;  $p = 0,003$ ).<sup>1</sup> Una fuerte correlación entre los niveles de NfL en LCR y sangre ha sido demostrada de forma convincente a través de un número de enfermedades neurológicas, por lo que la ausencia de datos en LCR en este estudio no limita la relevancia de los hallazgos.

Rohrer y colegas<sup>1</sup> aportan fuerte evidencia apoyando el rol potencial del NfL sérico como un marcador de progresión de enfermedad en la demencia frontotemporal. Sus resultados están en línea con hallazgos recientes en modelos experimentales de ratones con enfermedades neurodegenerativas proteopáticas (tau,  $\beta$ -amiloide y  $\alpha$ -sinucleína) en las cuales los niveles de NfL en LCR y plasma fueron respondedores a la manipulación experimental o a la terapia específica.<sup>3</sup> Futuros estudios en cohortes mayores de pacientes bien caracterizados se necesitan para caracterizar mejor el NfL como biomarcador primario para predecir y monitorear la progresión de la enfermedad y evaluar las respuestas al tratamiento.

1. Rohrer JD, Woollacott IOC, Dick KM, et al. Serum neurofilament light chain protein is a measure of disease intensity in frontotemporal dementia. *Neurology* 2016;87:1329–1336.
2. Kuhle J, Barro C, Andreasson U, et al. Comparison of three analytical platforms for quantification of the neurofilament light chain in blood samples: ELISA, electrochemiluminescence immunoassay and Simoa. *Clin Chem Lab Med Epub* 2016 Apr 12. doi:10.1515/cclm-2015-1195.
3. Bacioglu M, Maia L, Preische O, et al. Neurofilament light chain in blood and CSF as marker of disease progression in mouse models and in neurodegenerative diseases. *Neuron* 2016;91:56–66.
- 4.

Jens Kuhle, MD, PhD

De Neurology, Departments of Medicine, Clinical Research and Biomedicine, University Hospital Basel, Switzerland.

Fondos para el estudio: no se reportan fondos.

Declaración de intereses: J.K. informa que la University Hospital Basel como empleador de J.K. ha recibido apoyo y se ha dedicado a la investigación y recibe fondos de Novartis Protagen AG; cargos como disertante de la Swiss MS Society, Biogen, Novartis, Roche y Genzyme; gastos para viajes de Merck Serono y Novartis; becas de ECTRIMS Research Fellowship Programme, University of Basel, Swiss MS Society, Swiss National Research Foundation, Bayer (Schweiz) AG, Genzyme, Novartis y Roche. Ir a Neurology.org para declaraciones completas.

### CONTRIBUCIONES DE LOS AUTORES

J.D.R., K.D.M., E.B., S.M., J.M.S., N.C.F. y J.D.W. estuvieron involucrados en el reclutamiento de pacientes y la recolección de datos. J.T., R.D., N.N., U.A., K.B. y H.Z. estuvieron involucrados en el desarrollo del ensayo, el procesamiento de muestras y el análisis. J.D.R., I.O.C.W., K.M.D., E.B., E.G., A.F., M.J.C. y S.O. estuvieron involucrados en el análisis de los datos psicométricos y de imagen. J.D.R. e I.O.C.W. hicieron el borrador de la versión inicial y las figuras. J.D.R., I.O.C.W. y J.M.N. realizaron el análisis estadístico. Todos los autores contribuyeron con la revisión y la edición del manuscrito.

### FONDOS PARA EL ESTUDIO

Este trabajo recibió fondos del Medical Research Council, UK, Alzheimer's Research UK, la Vinnova Foundation Sweden, la Torsten Söderberg Foundation at the Royal Swedish Academy of Sciences, el Swedish Research Council, y el Knut and Alice Wallenberg Foundation. Los autores reconocen el apoyo de la NIHR Queen Square Dementia Biomedical Research Unit, Leonard Wolfson Experimental Neurology Centre y el University College London Hospitals NHS Trust Biomedical Research Centre. El Dementia Research Centre es un centro de coordinación de investigación de Alzheimer en UK y ha recibido equipos pagados por el Alzheimer's Research UK y Brain Research Trust. El National Prion Monitoring Cohort study (de donde se utilizaron las muestras séricas de los controles sanos) recibió fondos del Department of Health (England), el National Institute of Health Research's Biomedical Research Centre at UCLH y el Medical Research Council.

### DECLARACIÓN DE INTERESES

J. Rohrer es un MRC Clinician Scientist y ha recibido fondos de NIHR Rare Disease Translational Research Collaboration. I. Woollacott es apoyado por una beca de entrenamiento del MRC Clinical Research (MR/M018288/1). K. Dick, E. Brotherhood, E. Gordon, A. Fellows, J. Toombs, R. Druey, J. Cardoso, S. Ourselin y J. Nicholas no tienen nada para declarar relevante al manuscrito. N. Norgren es empleado de UmanDiagnostics. Es cofundador del Brain Biomarker Solutions in Gothenburg AB, una compañía GU Holding-based en la University of Gothenburg. S. Mead y U. Andreasson no tienen nada para declarar relevante al manuscrito. K. Blennow es un cofundador de Brain Biomarker Solutions en Gothenburg AB, una GU Holding-based platform company en la University of Gothenburg. J. Schott no tiene nada para declarar relevante al manuscrito. N. Fox es investigador del NIHR. J. Warren es apoyado por un Wellcome Trust Senior Clinical Fellowship (091673/Z/10/Z). H. Zetterberg es un cofundador del Brain Biomarker Solutions in Gothenburg AB, una GU Holding-based platform company en la University of Gothenburg. Ir a Neurology.org para declaraciones completas.

## BIBLIOGRAFÍA

1. Seelaar H, Rohrer JD, Pijnenburg YA, Fox NC, van Swieten JC. Clinical, genetic and pathological heterogeneity of frontotemporal dementia: a review. *J Neurol Neurosurg Psychiatry* 2011;82:476–486.
2. Warren JD, Rohrer JD, Rossor MN. Clinical review: frontotemporal dementia. *BMJ* 2013;347:f4827.
3. Rohrer JD, Zetterberg H. Biomarkers in frontotemporal dementia. *Biomark Med* 2014;8:519–521.
4. Rosengren LE, Karlsson JE, Sjögren M, Blennow K, Wallin A. Neurofilament protein levels in CSF are increased in dementia. *Neurology* 1999;52:1090–1093.
5. Sjögren M, Rosengren L, Minthon L, Davidsson P, Blennow K, Wallin A. Cytoskeleton proteins in CSF distinguish frontotemporal dementia from AD. *Neurology* 2000;54:1960–1964.
6. Brettschneider J, Petzold A, Schottle D, Claus A, Riepe M, Tumani H. The neurofilament heavy chain (NfH) in the cerebrospinal fluid diagnosis of Alzheimer's disease. *Dement Geriatr Cogn Disord* 2006;21:291–295.
7. Petzold A, Keir G, Warren J, Fox N, Rossor MN. A systematic review and meta-analysis of CSF neurofilament protein levels as biomarkers in dementia. *Neurodegener Dis* 2007;4:185–194.
8. Pijnenburg YA, Janssen JC, Schoonenboom NS, et al. CSF neurofilaments in frontotemporal dementia compared with early onset Alzheimer's disease and controls. *Dement Geriatr Cogn Disord* 2007;23:225–230.
9. de Jong D, Jansen RW, Pijnenburg YA, et al. CSF neurofilament proteins in the differential diagnosis of dementia. *J Neurol Neurosurg Psychiatry* 2007;78:936–938.
10. Landqvist Waldö M, Frizell Santillo A, Passant U, et al. Cerebrospinal fluid neurofilament light chain protein levels in subtypes of frontotemporal dementia. *BMC Neurol* 2013;13:54.
11. Scherling CS, Hall T, Berisha F, et al. Cerebrospinal fluid neurofilament concentration reflects disease severity in frontotemporal degeneration. *Ann Neurol* 2014;75:116–126.
12. Teunissen CE, Dijkstra C, Polman C. Biological markers in CSF and blood for axonal degeneration in multiple sclerosis. *Lancet Neurol* 2005;4:32–41.
13. Tortelli R, Ruggieri M, Cortese R, et al. Elevated cerebrospinal fluid neurofilament light levels in patients with amyotrophic lateral sclerosis: a possible marker of disease severity and progression. *Eur J Neurol* 2012;19:1561–1567.
14. Lu CH, Macdonald-Wallis C, Gray E, et al. Neurofilament light chain: a prognostic biomarker in amyotrophic lateral sclerosis. *Neurology* 2015;84:2247–2257.
15. Rissin DM, Kan CW, Campbell TG, et al. Single-molecule enzyme-linked immunosorbent assay detects serum proteins at subfemtomolar concentrations. *Nat Biotechnol* 2010;28:595–599.
16. Kuhle J, Barro C, Andreasson U, et al. Comparison of three analytical platforms for quantification of the neurofilament light chain in blood samples: ELISA, electrochemiluminescence immunoassay and Simoa. *Clin Chem Lab Med Epub* 2016 Apr 12. doi: 10.1515/cclm-2015-1195.
17. Rascovsky K, Hodges JR, Knopman D, et al. Sensitivity of revised diagnostic criteria for the behavioural variant of frontotemporal dementia. *Brain* 2011;134:2456–2477.
18. Strong MJ, Grace GM, Freedman M, et al. Consensus criteria for the diagnosis of frontotemporal cognitive and behavioural syndromes in amyotrophic lateral sclerosis. *Amyotroph Lateral Scler* 2009;10:131–146.
19. Gorno-Tempini ML, Hillis AE, Weintraub S, et al. Classification of primary progressive aphasia and its variants. *Neurology* 2011;76:1006–1014.
20. Wechsler D. Wechsler Abbreviated Scale of Intelligence. San Antonio, TX: The Psychological Corporation; 1999.
21. Warrington EK. Manual for the Recognition Memory Test for Words and Faces. Windsor, UK: NFER-Nelson; 1984.
22. McKenna P, Warrington EK. Testing for nominal dysphasia. *J Neurol Neurosurg Psychiatry* 1980;43:781–788.
23. Jackson M, Warrington EK. Arithmetic skills in patients with unilateral cerebral lesions. *Cortex* 1986;22:611–620.
24. Delis DC, Kaplan E, Kramer JH. Delis-Kaplan Executive Function System (D-kefs). San Antonio, TX: The Psychological Corporation; 2001.
25. Folstein M, Folstein S, McHugh P. The "Mini Mental State": a practical method for grading the cognitive state of patients for the clinician. *J Psychiatr Res* 1975;12:189–198.
26. Freeborough PA, Fox NC, Kitney RI. Interactive algorithms for the segmentation and quantitation of 3-D MRI brain scans. *Comput Methods Programs Biomed* 1997;53:15–25.
27. Freeborough PA, Fox NC. The boundary shift integral: an accurate and robust measure of cerebral volume changes from registered repeat MRI. *IEEE Trans Med Imaging* 1997;16:623–629.
28. Cardoso MJ, Modat M, Wolz R, et al. Geodesic information flows: spatially-variant graphs and their application to segmentation and fusion. *IEEE Trans Med Imaging* 2015;34:1976–1988.
29. Rohrer JD, Nicholas JM, Cash DM, et al. Presymptomatic cognitive and neuroanatomical changes in genetic frontotemporal dementia in the Genetic Frontotemporal dementia Initiative (GENFI) study: a cross-sectional analysis. *Lancet Neurol* 2015;14:253–262.
30. Disanto G, Adiutori R, Dobson R, et al. Serum neurofilament light chain levels are increased in patients with a clinically isolated syndrome. *J Neurol Neurosurg Psychiatry* 2016;87:126–129.
31. Kuhle J, Gaiottino J, Leppert D, et al. Serum neurofilament light chain is a biomarker of human spinal cord injury severity and outcome. *J Neurol Neurosurg Psychiatry* 2015;86:273–279.
32. Al Nimer F, Thelin E, Nyström H, et al. Comparative assessment of the prognostic value of biomarkers in traumatic brain injury reveals an independent role for serum levels of neurofilament light. *PLoS One* 2015;10:e0132177.
33. Mahoney CJ, Beck J, Rohrer JD, et al. Frontotemporal dementia with the C9ORF72 hexanucleotide repeat severity and outcome. *J Neurol Neurosurg Psychiatry* 2015;86:273–279.
34. Knopman DS, Kramer JH, Boeve BF, et al. Development of methodology for conducting clinical trials in frontotemporal lobar degeneration. *Brain* 2008;131:2957–2968.
35. Mioshi E, Hsieh S, Savage S, Hornberger M, Hodges JR. Clinical staging and disease progression in frontotemporal dementia. *Neurology* 2010;74:1591–1597.
